# Supplementary material
Source: PubMed Central journal article supplement (PMC8017976)
Supplement: pnas.2020380118.sapp.pdf [file pnas.2020380118.sapp.pdf]

## **SUPPORTING INFORMATION APPENDIX**

### **SI Results and discussion**

#### **Identification of coumaphos resistance, in a *Varroa* population for the Aegean island Andros**

Among several populations tested with a coumaphos diagnostic dose of 200 mg a.i./L, which caused approximately 95% mortality in the ATH-S population, the AN-CR population from the Aegean island Andros exhibited substantially reduced mortality rates (7%) compared to other populations tested (Table S1). This Andros population originated from a beekeeper who used coumaphos almost exclusively for many years.

#### **Acaricide uptake/penetration is not involved in resistance**

Acaricide uptake (penetration) was analysed by comparing <sup>14</sup>C coumaphos internalization between the AN-CR and the ATH-S populations after (tarsal) sublethal exposure on coated bioassay vials. The internalization of <sup>14</sup>C coumaphos was approximately 10% (internal cpm/total cpm) over the time span of the experiment for both populations and not significantly different between resistant and susceptible mites (Table S2), indicating that reduced penetration is not involved in resistance.

#### **Identical carboxyl/choline esterases profile between resistant and susceptible *Varroa***

Total protein extract was used to profile general esterase hydrolytic activity against 1-NA after separation by IEF 3 – 10 (Figure S1). Several bands displayed esterase activity, all in the zone between pI 6.0 and 4.5 and the profile was identical between the two populations ATH-S and AN-CR (Figure S1), indicating that carboxyl/choline esterases are not involved in resistance.

#### ***Varroa* transcriptome analysis and honey bee viruses**

After filtering the RNAseq dataset (Table S3) for the presence of viral sequences (Table S4), a total of 42.4, 59.1 and 45.2 million Illumina paired-end reads were obtained for ATH-S, AN-CR and tAN-CR, respectively. Alignment of the filtered RNA-seq reads against the *V. destructor* genome resulted in an overall mapping rate of uniquely mapped reads of  $86.7 \pm 1.7$  SE% across samples (Table S4). A PCA revealed that 51.7% of the total variation could be explained by principal component 1 (PC1) while 19.4%

could be explained by PC2. Replicates clustered by resistance phenotype, regardless of coumaphos exposure in the AN-CR and tAN-CR populations (Figure S2). A differential gene expression analysis was subsequently performed between the AN-CR and the ATH-S population and between the coumaphos treated tAN-CR population and the AN-CR population. A total of 270 DEGs were identified in AN-CR compared to ATH-S (fold change (FC) > 2 and a Benjamini-Hochberg adjusted p-value < 0.05) (Dataset S2). Twenty-eight DEGs were differentially overexpressed, whereas 242 were underexpressed. Only one gene was differentially expressed in the pairwise comparison between the tAN-CR and AN-CR populations (*cytb*; log<sub>2</sub>FC of 1.03, Dataset S2).

## **SI Materials and Methods**

### **Mite populations**

*Varroa* mites from infested *A. mellifera* hives were collected from six different locations in Greece (Athens, Thessaloniki, Sparti, Crete, Andros, Naxos), based on the history of acaricide applications and indications of treatment failures reported by beekeepers. From each analyzed hive and location, brood frames were collected, brood cells uncapped and *Varroa* mites that were either on the bee larvae or in the inner surface of the bee brood cell were collected in an Eppendorf tube using a fine paintbrush.

### **Diagnostic bioassays**

Chemicals dissolved in acetone were freshly prepared at different concentrations and 0.5 mL of solutions was placed into individual 12-mL glass vials. Vials were rolled until the acetone evaporated, leaving a uniform film of acaricide on the inner surface of the vials. Batches of ten (10) adult female mites were introduced into the coated vials, closed with holed parafilm, each time at 25 °C for 20 h. Diagnostic assays based on the LC<sub>95</sub> of the ATH-S were conducted.

### **Penetration rate of <sup>14</sup>C coumaphos.**

The penetration rate of <sup>14</sup>C coumaphos in *Varroa* populations was determined according to Balabanidou et al (2016) (1) with slight modifications. Briefly, pools of 5-10 female *Varroa* mites were exposed to [<sup>14</sup>C] coumaphos coated bioassay vials at approximately LC<sub>5</sub> for each population at 2 h for 25°C. Subsequently, they were rinsed

three times with 200  $\mu$ l methanol and homogenized in pools of 10 in 200  $\mu$ l methanol. Ten milliliters of liquid Scintillation Counting Mixture (Ultima Gold; 6013326; PerkinElmer) were added to each sample and the corresponding counts per minute were measured on a beta counter (LS1701; Beckman). The penetration rate (PR) was calculated as the ratio of internal counts per minute to total counts per minute.

### **Isoelectric focusing polyacrylamide analysis (IEF)**

Isoelectric focusing (IEF) on polyacrylamide gels was performed for the separation of CCEs, as previously described (2). IEF was conducted with an Xcell Surelock Mini-Cell (Invitrogen, Groningen, The Netherlands) using precast IEF (5% polyacrylamide) gels with immobilized pH gradient in the pH ranges 3-10 and 3-7. Gels and samples (10 $\mu$ g protein extract) were prepared and run according to the manufacturer's instructions. CCEs were visualized with 1-naphthyl acetate (1-NA) and Fast blue RR.

### **Quality control and PCA analysis of RNAseq data**

The quality of the reads was verified using FASTQC version 0.11.5 (3). Sixteen out of twenty-four FASTQ files gave a warning for overrepresented sequences and a BLASTn search against the NCBI non-redundant nucleotide database showed that the majority of these overrepresented sequences had a best BLASTn hit with honeybee virus sequences. Subsequently, viral contamination was removed by aligning the generated reads to a selection of 19 bee virus genomes (Table S2) using STAR 2.5.0a, (4) and retaining the unmapped reads for subsequent analyses. Bee virus filtered reads were aligned to the *V. destructor* genome (GenBank: GCA\_002443255.1) (5) using the two-pass alignment mode of STAR 2.5.0a (4) with a maximum intron size set to 20kb. Read counts per gene were obtained using the default settings of HTSeq 0.6.0 (6) with the "STRANDED" flag set to "reverse", the "feature type" flag set to "exon", the "id" flag set to "gene" and the *Varroa* genome annotation (GCF\_002443255.1\_Vdes\_3.0\_genomic.gff, 10247 nuclear + 13 mitochondrial protein coding genes). A PCA was created as described by Love et al 2015 (7). Briefly, read counts were first normalized using the regularized-logarithm (rlog) transformation implemented in the DESeq2 R-package (8). A PCA was then performed using the R-packages stats (version 3.5.2) and ggplot2 (version 3.1.0) with the 1000 most variable genes across all RNA-seq samples (Figure S2).

## SI References

1. V. Balabanidou, *et al.*, Cytochrome P450 associated with insecticide resistance catalyzes cuticular hydrocarbon production in *Anopheles gambiae*. *Proc. Natl. Acad. Sci.* **113**, 9268–9273 (2016).
2. T. Van Leeuwen, S. Van Pottelberge, L. Tirry, Comparative acaricide susceptibility and detoxifying enzyme activities in field-collected resistant and susceptible strains of *Tetranychus urticae*. *Pest. Manag. Sci.* **61**, 499–507 (2005).
3. S. Andrews, FastQC: a quality control tool for high throughput sequence data (2010).
4. A. Dobin, *et al.*, STAR: ultrafast universal RNA-seq aligner. *Bioinformatics* **29**, 15–21 (2013).
5. M. A. Techer, *et al.*, Divergent evolutionary trajectories following speciation in two ectoparasitic honey bee mites. *Communications Biology* **2**, 357 (2019).
6. S. Anders, P. T. Pyl, W. Huber, HTSeq--a Python framework to work with high-throughput sequencing data. *Bioinformatics* **31**, 166–169 (2015).
7. M. I. Love, S. Anders, V. Kim, W. Huber, RNA-Seq workflow: gene-level exploratory analysis and differential expression. *F1000Res* **4**, 1070 (2015).
8. S. Anders, *et al.*, Count-based differential expression analysis of RNA sequencing data using R and Bioconductor. *Nat Protoc* **8**, 1765–1786 (2013).

## SI Figures

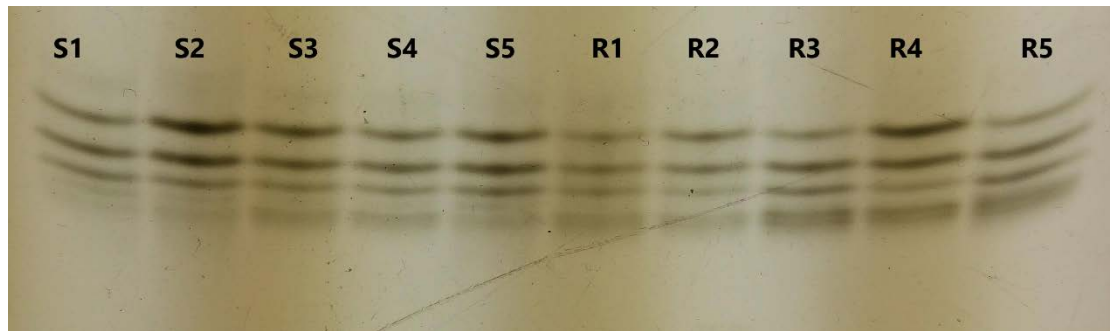

**Figure S1.** Isoelectric focusing polyacrylamide analysis (IEF) for the separation of carboxyl/choline esterases (CCEs). IEF was conducted with an Xcell Surelock Mini-Cell using precast IEF (5% polyacrylamide) gels with immobilized pH gradient in the pH ranges 3-10 and 3-7. Gels and samples (10 $\mu$ g protein extract) were prepared and run according to the manufacturer's instructions. Esterases isozymes between five Susceptible ATH-S (S1-S5) mites and five Resistant AN-CR (R1-R5) mites after separation with IEF pH 3-7, visualized with 1-NA activity staining.

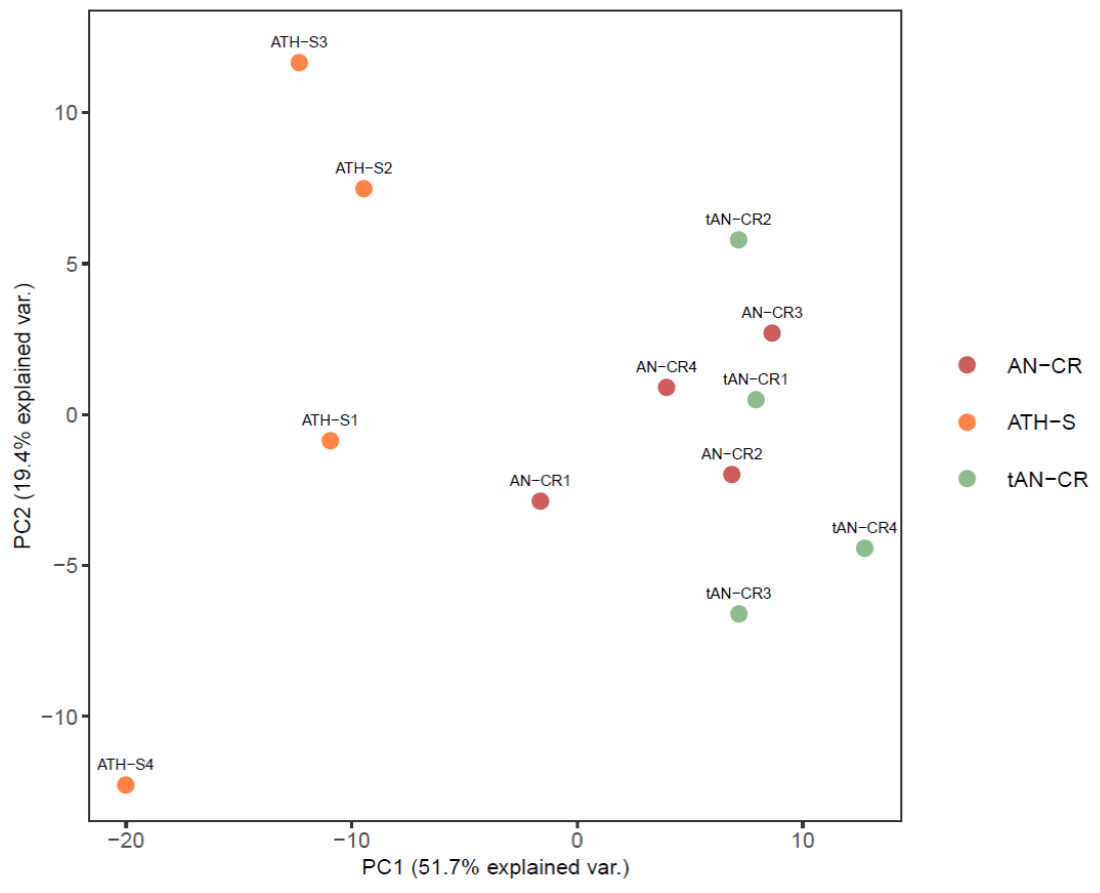

**Figure S2.** Principal component analysis (PCA). Gene expression relationships among *V. destructor* populations/treatments; coumaphos susceptible *V. destructor* population (ATH-S), coumaphos resistant *V. destructor* population (AN-CR) and coumaphos resistant *V. destructor* population treated with 200 mg a.i. coumaphos/L acetone (tAN-CR).

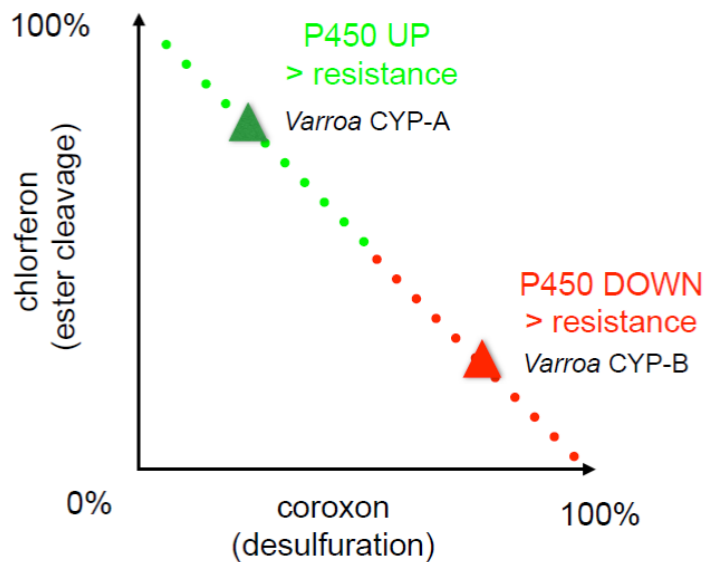

**Figure S3.** The Janus face of P450 metabolism of coumaphos. P450 enzymes can metabolize either the chloromethylcoumarinyl group, or the phosphorothioate (P=S) moiety. The latter reaction leads to two major products in proportions that are dependent on each P450 enzyme. The figure shows that the global P450 metabolism of the coumaphos P=S group in an organism, as well as of each P450 enzyme, is therefore located on the stippled line. All other factors being equal (tissue distribution, developmental expression), both up- or down-regulation of the P450 enzymes can theoretically lead to resistance. In this schematic example, up-regulation of CYP-A would increase ester cleavage (detoxification) more than desulfuration, while down-regulation of CYP-B would decrease desulfuration (activation to an AchE inhibitor) more than ester cleavage.

## SI Tables

**Table S1.** Percentage mortality of *Varroa* populations in response to coumaphos diagnostic dose (DD).

| Population     | Date   | n  | Mortality (%) | Number of applications (5y) | Global Positioning System coordinates (N,E) |
|----------------|--------|----|---------------|-----------------------------|---------------------------------------------|
| Athens (AUA-S) | 7/2017 | 80 | 93±4          | -                           | (37.982475, 23.705533)                      |
| Andros (AN-CR) | 9/2017 | 60 | 7±3           | C (10x)                     | (37.861864, 24.790071)                      |
| Sparti         | 7/2018 | 60 | 88±3          | A (6x),F(4x)                | (36.846375, 23.001934)                      |
| Naxos          | 9/2017 | 60 | 62±3          | C (5x),F(3x),A(2x)          | (37.099604, 25.482232)                      |
| Crete          | 9/2018 | 60 | 90±4          | A (5x),F(4x),C(1x)          | (35.284983, 25.062404)                      |
| Thessaloniki   | 7/2019 | 60 | 82±3          | A (5x),C(2x),O(3x)          | (40.579336, 23.046397)                      |

n: number of mites tested (in batches of 10);  
 DD: Diagnostic dose of 200 ppm, in 500ul used per vial;  
 C: coumaphos; A: Amitraz; F: tau-Fluvalinate



**Table S2.** Penetration Ratio of  $^{14}\text{C}$  Coumaphos in coumaphos resistant (AN-CR) and susceptible (ATH-S) *Varroa* mites.

| <b>Strain</b> | <b>PR(<math>10^{-2}</math>), (<math>\pm</math>SD)</b> | <b>P value</b> |
|---------------|-------------------------------------------------------|----------------|
| ATH-S         | 9.85 ( $\pm$ 0.39)                                    | 0.219          |
| AN-CR         | 10.35 ( $\pm$ 0.45)                                   |                |

n=3 biological replicates.

PR. Penetration Rate: ratio of internal counts per minute to total counts per minute; SD: Standard Deviation. Statistical analysis was performed with the independent samples t-test.

**Table S3.** Mapping rates of the strand-specific paired-end Illumina reads against the *V. destructor* genome.

|         | <b>Uniquely mapped reads (%)</b> | <b>Number of uniquely mapped reads</b> | <b>Averaged mapped length</b> | <b>Reads mapped to multiple loci</b> | <b>Reads unmapped too short (%)</b> | <b>Reads mapped to viral sequences</b> |
|---------|----------------------------------|----------------------------------------|-------------------------------|--------------------------------------|-------------------------------------|----------------------------------------|
| ATH-S1  | 81.75                            | 5027037                                | 248.7                         | 112374                               | 16.31                               | 8338159                                |
| ATH-S2  | 70.83                            | 13257087                               | 248.61                        | 258171                               | 27.70                               | 8134                                   |
| ATH-S3  | 90.44                            | 11533243                               | 248.75                        | 248464                               | 7.49                                | 2242060                                |
| ATH-S4  | 93.52                            | 12567678                               | 248.71                        | 283439                               | 4.23                                | 3741                                   |
| AN-CR1  | 85.39                            | 15008441                               | 248.58                        | 354428                               | 12.50                               | 2697507                                |
| AN-CR2  | 88.27                            | 13756632                               | 248.67                        | 391407                               | 9.14                                | 3881935                                |
| AN-CR3  | 87.60                            | 14181859                               | 248.61                        | 450747                               | 9.56                                | 1289973                                |
| AN-CR4  | 88.52                            | 16113546                               | 248.46                        | 358375                               | 9.45                                | 126384                                 |
| tAN-CR1 | 89.88                            | 12679321                               | 248.84                        | 308727                               | 7.88                                | 6515057                                |
| tAN-CR2 | 88.26                            | 11095579                               | 248.76                        | 339215                               | 8.98                                | 3933592                                |
| tAN-CR3 | 88.73                            | 13710691                               | 248.69                        | 286356                               | 9.36                                | 212792                                 |
| tAN-CR4 | 87.23                            | 7735415                                | 248.77                        | 241339                               | 10.01                               | 7593504                                |

**Table S4.** List of honey bee viruses and their accessions used to filter/align the FASTQ files with the STAR software (version: 2.5.3), using the two-pass alignment mode and the --outReadsUnmapped Fastx option. Unmapped reads were retained for the subsequent transcriptomic analyses.

| <b>Viruses</b>                | <b>Accession</b>                                |
|-------------------------------|-------------------------------------------------|
| Acute bee paralysis virus     | NC_002548.1                                     |
| Apis rhabdovirus              | KY354230.1                                      |
| Apis bunyavirus               | KY354236.1, KY354237.1                          |
| Apis dicistrovirus            | KY354239.1                                      |
| Apis flavivirus               | KY354238.1                                      |
| Apis noravirus                | KY354240.1                                      |
| Bee Macula like virus         | NC_027631.1                                     |
| Black queen cell virus        | NC_003784.1                                     |
| Chronic bee paralysis virus   | NC_010711.1                                     |
| Deformed wing virus           | NC_004830.2, KT733632.1, KT733627.1, KT733619.1 |
| Israeli acute paralysis virus | NC_009025.1                                     |
| Kakugo virus                  | AB070959.1, AB245506.1, KT733624.1, AB251935.1  |
| Kashmir bee virus             | NC_004807.1                                     |
| Lake Sinai virus              | KY354242.1, KY354241.1, KY354244.1              |
| Moku virus                    | NC_031338.1                                     |
| Sacbrood virus                | NC_002066.1                                     |
| Slow bee paralysis virus      | NC_014137.1                                     |
| Varroa destructor virus       | NC_006494.1                                     |
| Varroa tymo virus             | NC_027619.1                                     |

**Table S5.** List of primers used in the study

| Gene                              | Forward Primer sequence (5' →3')                                   | Reverse Primer sequence (5' →3')                                   | Product size | Reaction Efficiency |
|-----------------------------------|--------------------------------------------------------------------|--------------------------------------------------------------------|--------------|---------------------|
| <b>RT-qPCR primers</b>            |                                                                    |                                                                    |              |                     |
| 18S rRNA (LOC111253957)           | AATGCCATCATTACCATC<br>CT                                           | CAAAAACCAATCGGCAA<br>TCT                                           | 60 bp        | 99.91%              |
| NADH dehydrogenase (LOC111249888) | TCCGCTTAAGGAGCTTAT<br>CG                                           | ATCACGCACAGCAGGTT<br>ATC                                           | 72 bp        | 100.6%              |
| <i>CYP4EP4</i> (LOC111248731)     | CACGCACGGTCACAAAA<br>GAG                                           | CGGAAGAAAGCGGTCAG<br>GAT                                           | 143 bp       | 99.17%              |
| <i>CYP3012A6</i> (LOC111246534)   | CTTCAGCTTTGGGCCTCG<br>TA                                           | TCCGGTGTGTTGACGAGT<br>TT                                           | 147 bp       | 95.22%              |
| <b>dsRNA synthesis primers*</b>   |                                                                    |                                                                    |              |                     |
| dSGFP                             | <u>TAATACGACTCACTATA</u><br><u>GGGAGA</u> ACGTAACGGC<br>CACAAGTTC  | <u>TAATACGACTCACTATAG</u><br><u>GGAGACTTGTACAGCTC</u><br>GTCCATGCC | 600 bp       |                     |
| dSCYP4EP4                         | <u>TAATACGACTCACTATA</u><br><u>GGGAGAGCCTTGGACTG</u><br>CTAACAAGC  | <u>TAATACGACTCACTATAG</u><br><u>GGAGACCTGCAAGTCTG</u><br>CCTACTGT  | 417 bp       |                     |
| dSCYP3012A6                       | <u>TAATACGACTCACTATA</u><br><u>GGGAGAGT</u> GGAATTGCC<br>TTCGTCTGC | <u>TAATACGACTCACTATAG</u><br><u>GGAGATCGTATCTGCGCC</u><br>TCCTAGT  | 441 bp       |                     |

\* Part of the sequence (underlined) represents the T7 promoter for dsRNA synthesis

**Dataset S1** - *De novo* transcriptome assembly of *Varroa destructor* (CLC Genomics Workbench 11) described in this study.

Dataset S1 can be downloaded from the following link:

[https://drive.google.com/file/d/1-Z8gC9EO2Ophg8aqvaBoey\\_mfLj8CyOK/view?usp=sharing](https://drive.google.com/file/d/1-Z8gC9EO2Ophg8aqvaBoey_mfLj8CyOK/view?usp=sharing)

**Dataset S2** Differentially expressed genes (DEGs) ( $\log_2FC > 1$  and Benjamini-Hochberg adjusted p-value  $< 0.05$ ) between the pairwise comparisons of *V. destructor* populations/treatments. AN-CR vs ATH-S (Worksheet1), tAN-CR vs ATH-S (Worksheet2) and tAN-CR vs AN-CR (Worksheet3). Worksheet 4 and 5 contain the shared over- and underexpressed DEGs between the AN-CR vs ATH-S and tAN-CR vs ATH-S comparisons, respectively.

Dataset S2 can be downloaded from the following link:

<https://drive.google.com/file/d/1woJoPjy5ChpjwmgvU6pbwUqKeKrUACtK/view?usp=sharing>
